# Supplementary material for: Novel Therapeutic Potentials of Taxifolin for Obesity-Induced Hepatic Steatosis, Fibrogenesis, and Tumorigenesis
Source: MDPI journal article supplement (doi:10.3390/nu15020350), 2023-01-10
Supplement: s1 [file s1]

## Supplementary Materials

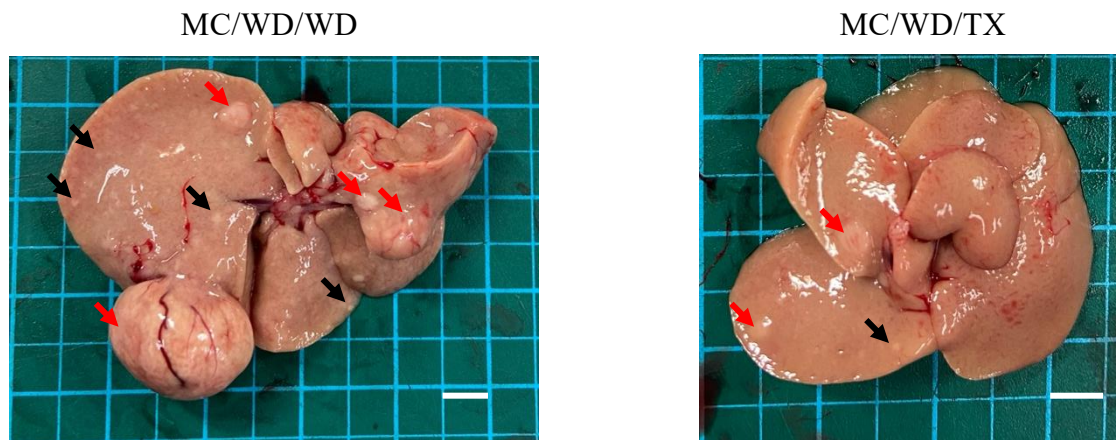

**Figure S1. Representative image of gross appearance of livers.**

For assessment of tumor development, the number and the size of lumps were measured in the liver, in which the lumps less than 1 mm and larger than 1 mm were considered as foci (black arrows) and tumors (red arrows), respectively. Scale bars: 5mm.

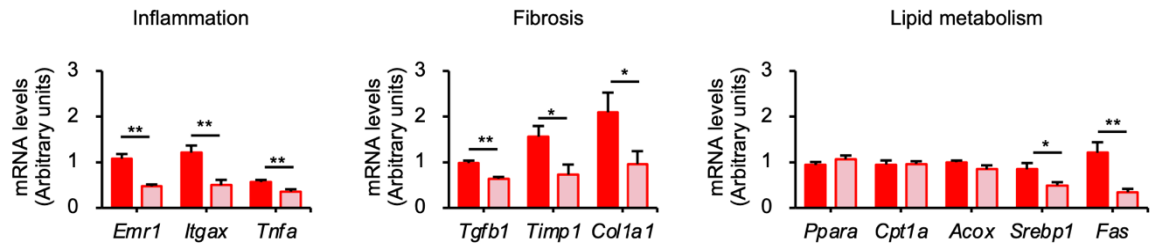

**Figure S2. Expression levels of genes related to inflammation, fibrosis, and lipid metabolism in the liver of a NASH model treated with Taxifolin.**

*Mc4r*-deficient mice were fed a Western diet for 16 weeks to develop NASH, and then treated with or without 3% of Taxifolin for additional 8 weeks (MC/WD/WD or MC/WD/TX, respectively). Hepatic expression levels of genes related to inflammation, fibrosis, and lipid metabolism were measured.  $n = 10-11$ , \* $P < 0.05$ , \*\* $P < 0.01$ .

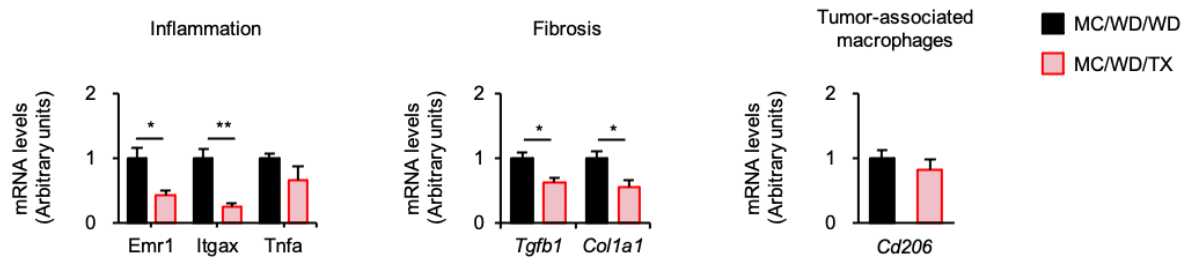

**Figure S3. Expression levels of genes related to inflammation, fibrosis, and tumor associated macrophage in tumorous lesions of the liver in a mouse model of NASH treated with Taxifolin.**

*Mc4r*-deficient mice were fed a Western Diet for 20 weeks to develop NASH, and then treated with or without 3% of Taxifolin for additional 30 weeks (MC/WD/WD or MC/WD/TX, respectively). Hepatic expression levels of genes related to inflammation, fibrosis, and tumor-associated macrophages (*Cd206*) were measured.  $n = 7-12$ , \*  $P < 0.05$ , \*\*  $P < 0.01$ .

**Table S1. Primers for mice used in the present study**

| <i>Genes</i>  | Primers | Primers                  |
|---------------|---------|--------------------------|
| <i>Acc1</i>   | Forward | TGAGATTGGCATGGTAGCCTG    |
|               | Reverse | CTCGGCCATCTGGATATTCAG    |
| <i>Acox</i>   | Forward | GCCTTTGTTGTCCCTATCCGT    |
|               | Reverse | CGATATCCCCAACAGTGATGC    |
| <i>Col1a1</i> | Forward | CCTCAGGGTATTGCTGGACAAC   |
|               | Reverse | ACCACTTGATCCAGAAGGACCTT  |
| <i>Cpt1a</i>  | Forward | CCTGCATTCTTCCCATTG       |
|               | Reverse | TGCCCATGTCCTTGTAATGTG    |
| <i>Dio2</i>   | Forward | CAGTGTGGTGCACGTCTCCAATC  |
|               | Reverse | TGAACCAAAGTTGACCACCAG    |
| <i>Emr1</i>   | Forward | CTTTGGCTATGGGCTTCCAGTC   |
|               | Reverse | GCAAGGAGGACAGAGTTTATCGTG |
| <i>Fasn</i>   | Forward | CCTGGATAGCATTCCGAACCT    |
|               | Reverse | AGCACATCTCGAAGGCTACACA   |
| <i>Il-1b</i>  | Forward | CTGAACTCAACTGTGAAATGCCA  |
|               | Reverse | AAAGGTTTGGAAGCAGCCCT     |
| <i>Itgax</i>  | Forward | GCCATTGAGGGCACAGAGA      |
|               | Reverse | GAAGCCCTCCTGGGACATCT     |
| <i>Pgc1a</i>  | Forward | CCCTGCCATTGTTAAGACC      |
|               | Reverse | TGCTGCTGTTCCCTGTTTTT     |
| <i>Ppara</i>  | Forward | AGGAAGCCGTTCTGTGACAT     |
|               | Reverse | AATCCCCTCCTGCAACTTCT     |
| <i>Prdm16</i> | Forward | CAGCACGGTGAAGCCATTC      |
|               | Reverse | GCGTGCATCCGCTTGTG        |
| <i>Scd1</i>   | Forward | CATCATTCTCATGGTCCTGCT    |
|               | Reverse | CCCAGTCGTACACGTCATTTT    |
| <i>Srebp1</i> | Forward | GGAGCCATGGATTGCACATT     |
|               | Reverse | GGCCCGGGAAGTCACTGT       |
| <i>Tgfb1</i>  | Forward | CCTGAGTGGCTGTCTTTTGACG   |
|               | Reverse | AGTGAGCGCTGAATCGAAAGC    |
| <i>Timp1</i>  | Forward | CATCACGGGCGCCTA          |
|               | Reverse | AAGCTGCAGGCACTGATGTG     |
| <i>Tnfa</i>   | Forward | ACCCTCACACTCAGATCATCTTC  |
|               | Reverse | TGGTGGTTTGCTACGACGT      |
| <i>Ucp1</i>   | Forward | TACACGGGGACCTACAATGCT    |

|             |         |                      |
|-------------|---------|----------------------|
|             | Reverse | TCGCACAGCTTGGTACGCTT |
| <i>18s</i>  | Forward | CGATGCTCTTAGCTGAGTGT |
|             | Reverse | GGTCCAAGAATTCACCTCT  |
| <i>36B4</i> | Forward | GGCCCTGCACTCTCGCTTTC |
|             | Reverse | TGCCAGGACGCGCTTGT    |

**Table S2. Primers for humans used in the present study**

| <i>Genes</i>  | Primers | Primers                    |
|---------------|---------|----------------------------|
| <i>EVA1</i>   | Forward | GGAATCCTGAGCGGTACGATG      |
|               | Reverse | ATCCTGCCTCCACATGTACG       |
| <i>ELOVL3</i> | Forward | CACTGGTACCACCACAGCAC       |
|               | Reverse | ATCCTGCCTCCACATGTACG       |
| <i>FASN</i>   | Forward | AACCGGCTCTCCTTCTTCTTCGACTT |
|               | Reverse | TCCGAGCGGCAGTACCCATTC      |
| <i>GAPDH</i>  | Forward | CCACTCCTCCACCTTTGAC        |
|               | Reverse | ACCCTGTTGCTGTAGCCA         |
| <i>Prdm16</i> | Forward | CGAGGCCCTGTCTACATTC        |
|               | Reverse | GCTCCCATCCGAAGTCTGTC       |
| <i>Srebp1</i> | Forward | AAACTCAAGCAGGAGAACCTAAGTCT |
|               | Reverse | GTCAGTGTGTCCTCCACCTCAGT    |
| <i>Ucp1</i>   | Forward | AAATCAGCTCCGCCTCTCTC       |
|               | Reverse | TGCCACTCCTCCAGTCGTTA       |
| <i>18S</i>    | Forward | CCTGGATACCGCAGCTAGGA       |
|               | Reverse | GCGGCGCAATACGAATGCCCC      |

**Table S3. Preventive effects of Taxifolin on serum parameters in *Mc4r*-deficient mice fed a Western diet**

| Variable       | WT/SD         | MC/WD        | MC/WD-TX       |
|----------------|---------------|--------------|----------------|
| ALT (U/L)      | 29.2 ± 2.5**  | 355.5 ± 28.7 | 186.1 ± 35.8** |
| AST (U/L)      | 104.8 ± 9.6** | 343.1 ± 44.9 | 157.6 ± 17.0** |
| TC (mg/dL)     | 69.2 ± 2.0**  | 288.1 ± 14.2 | 178.7 ± 5.7**  |
| TG (mg/dL)     | 69.7 ± 4.8    | 57.0 ± 5.4   | 57.8 ± 3.5     |
| BG-5w (mg/dL)  | 156.8 ± 6.2   | 159.2 ± 8.4  | 173.1 ± 8.7    |
| BG-10w (mg/dL) | 149.0 ± 5.3   | 173.1 ± 9.6  | 173.9 ± 6.6    |
| BG-19w (mg/dL) | 162.3 ± 6.4   | 142.3 ± 4.2  | 164.3 ± 9.0    |

ALT: alanine aminotransferase, AST: aspartate aminotransferase, TC: total cholesterol, TG: triglyceride, BG: blood glucose. Data are expressed as mean ± SE.

\* $P < 0.05$ , \*\* $P < 0.01$  versus MC/WD

**Table S4. Therapeutic effects of Taxifolin on serum parameters in *Mc4r*-deficient mice fed a Western diet after the mice developed NASH.**

| Variable   | MC/WD         | MC/WD/WD     | MC/WD/TX       |
|------------|---------------|--------------|----------------|
| ALT (U/L)  | 305.4 ± 79.6  | 373.7 ± 70.0 | 193.8 ± 20.5   |
| AST (U/L)  | 202.5 ± 24.3* | 306.3 ± 32.9 | 176.5 ± 18.7** |
| TC (mg/dL) | 209.5 ± 6.8** | 268.6 ± 14.1 | 237.5 ± 13.9   |
| TG (mg/dL) | 53.1 ± 2.6    | 81.3 ± 15.0  | 83.5 ± 12.6    |
| BG (mg/dL) | 187.8 ± 13.2  | 199.8 ± 6.5  | 190.4 ± 10.7   |

ALT: alanine aminotransferase, AST: aspartate aminotransferase, TC: total cholesterol, TG: triglyceride, BG: blood glucose. Data are expressed as mean ± SE.

\* $P < 0.05$ , \*\* $P < 0.01$  versus MC/WD/WD
